# Supplementary material for: Shifts among Eukaryota, Bacteria, and Archaea define the vertical organization of a lake sediment
Source: PubMed Central journal article supplement (PMC5385010; doi:10.1186/s40168-017-0255-9), 2017-04-08
Supplement: 40168_2017_255_MOESM10_ESM.pdf [file 40168_2017_255_MOESM10_ESM.pdf]

present factors

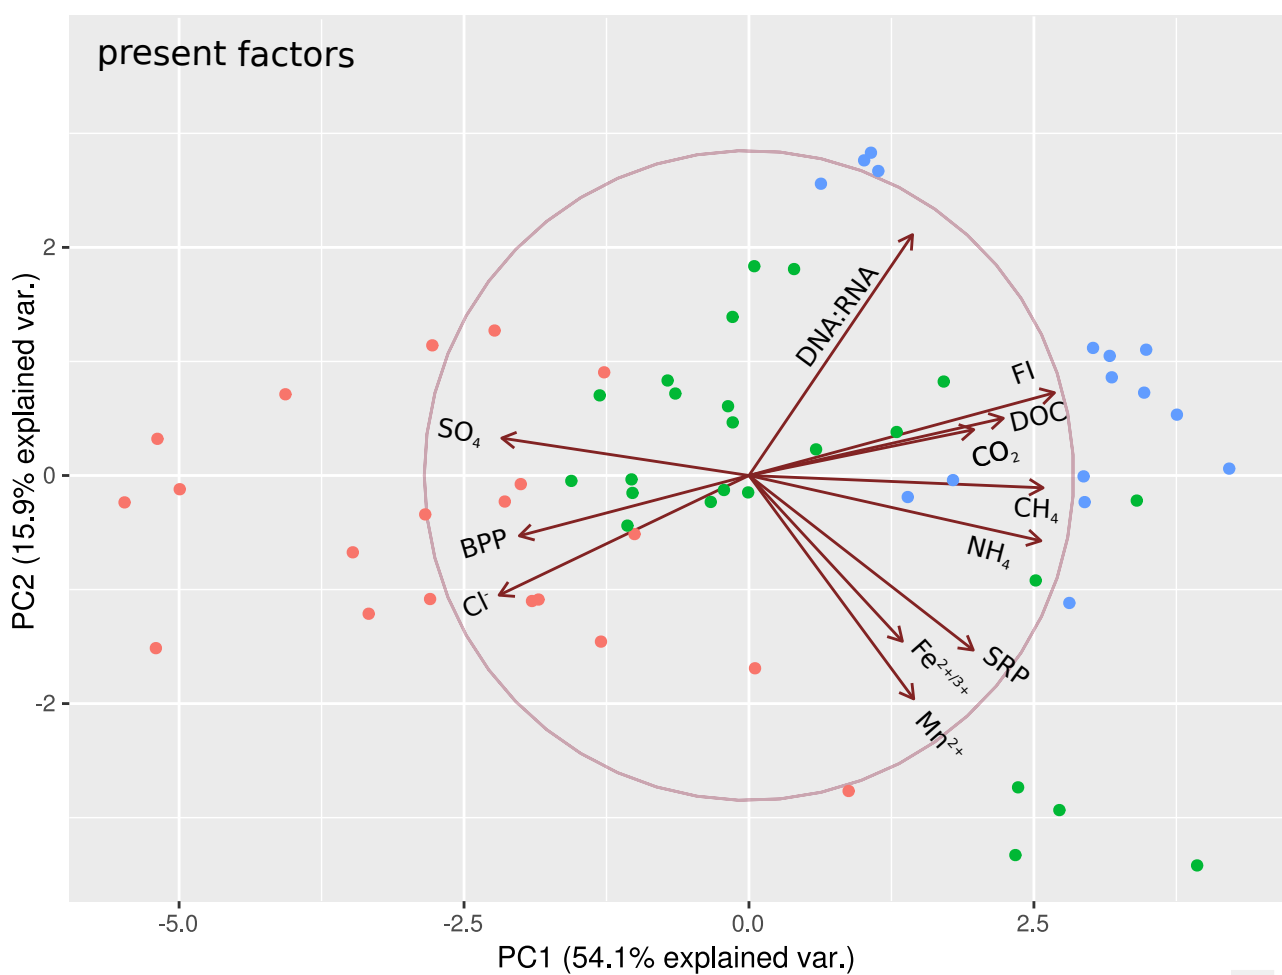

past factors

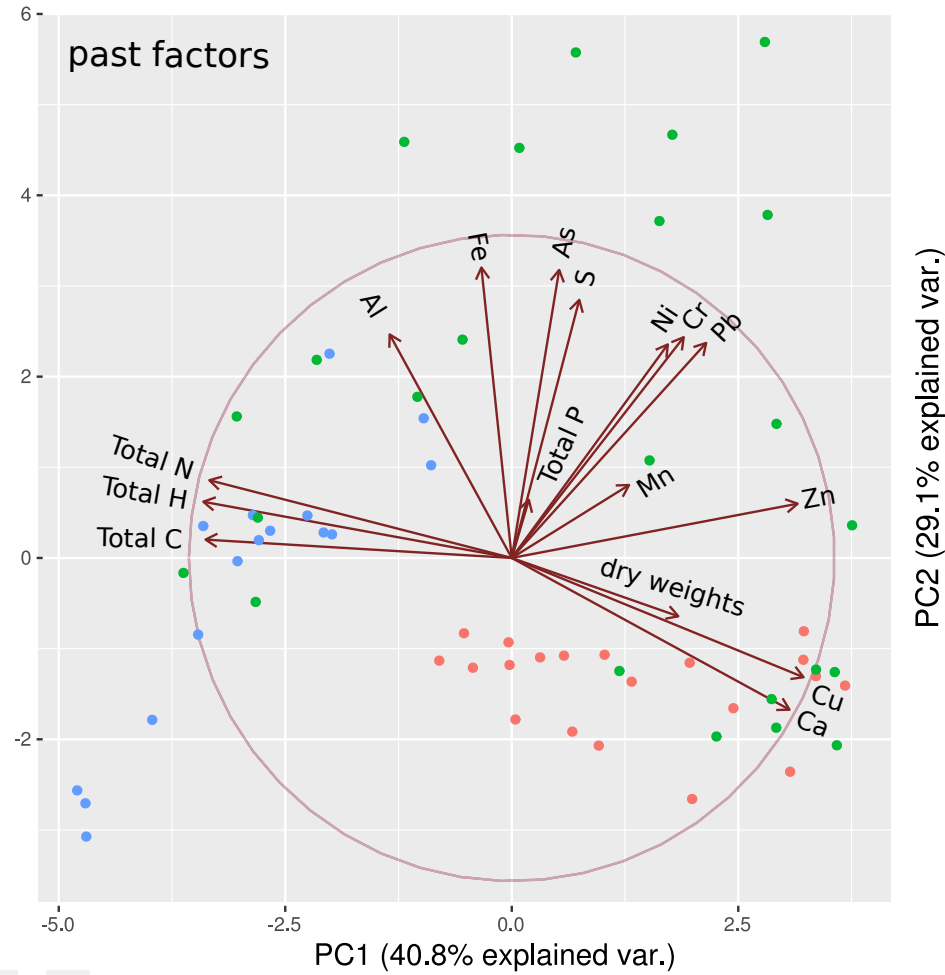

a b c
